# Supplementary material for: DOCK2 confers immunity and intestinal colonization resistance to Citrobacter rodentium infection
Source: PubMed Central journal article supplement (PMC4904218; doi:10.1038/srep27814), 2016-06-13

## SUPPLEMENTARY INFORMATION

### **DOCK2 confers immunity and intestinal colonization resistance to *Citrobacter rodentium* infection**

Zhiping Liu<sup>1</sup>, Si Ming Man<sup>1</sup>, Qifan Zhu<sup>1,2</sup>, Peter Vogel<sup>3</sup>, Sharon Frase<sup>4</sup>, Yoshinori Fukui<sup>5</sup>,  
and Thirumala-Devi Kanneganti<sup>1,\*</sup>

<sup>1</sup> Department of Immunology, St. Jude Children's Research Hospital, Memphis, TN, 38105, USA;

<sup>2</sup> Integrated Biomedical Sciences Program, University of Tennessee Health Science Center, Memphis, Tennessee 38163, USA;

<sup>3</sup> Animal Resources Center and the Veterinary Pathology Core, St. Jude Children's Research Hospital, Memphis, TN, 38105, USA;

<sup>4</sup> Cell and Tissue Imaging Center, St. Jude Children's Research Hospital, Memphis, TN, 38105, USA;

<sup>5</sup> Division of Immunogenetics, Department of Immunobiology and Neuroscience, Medical Institute of Bioregulation, Kyushu University, Fukuoka 812-8582, Japan.

\*Correspondence: Thirumala-Devi Kanneganti, Department of Immunology, MS 351, St Jude Children's Research Hospital, 262 Danny Thomas Place, Memphis, TN 38105-3678  
Tel: (901) 595-3634; Fax. (901) 595-5766.

E-mail: [Thirumala-Devi.Kanneganti@StJude.org](mailto:Thirumala-Devi.Kanneganti@StJude.org).

## Supplementary figures legends

**Supplementary Figure S1. *DOCK2*<sup>-/-</sup> mice do not have an impaired ability to produce cytokines during *C. rodentium* infection.** (A) Levels of IL-17, IFN- $\gamma$  and TNF- $\alpha$  proteins in the colon 14 days post-infection with *C. rodentium*. (B and C) Real-time qPCR analysis of the expression of genes encoding IL-23p19 (B) and IL-22 (C) in colon tissues of WT and *Dock2*<sup>-/-</sup> mice infected with *C. rodentium*. Data are representative of two independent experiments (mean and SEM). Two-tailed *t*-test. \*,  $P < 0.05$ ; NS, not statistically significant.

**Supplementary Figure S2. *DOCK2*<sup>-/-</sup> mice have similar expression of the gene encoding mucin.** Real-time qPCR analysis of the expression of genes encoding MUC1, MUC, MUC3 and MUC4 in the colon of WT and *DOCK2*<sup>-/-</sup> mice 4 days post-infection with *C. rodentium*. Data are representative of two independent experiments (mean and SEM). Two-tailed *t*-test. NS, not statistically significant.

**Supplementary Table S1. Real time qPCR primer sequence.**

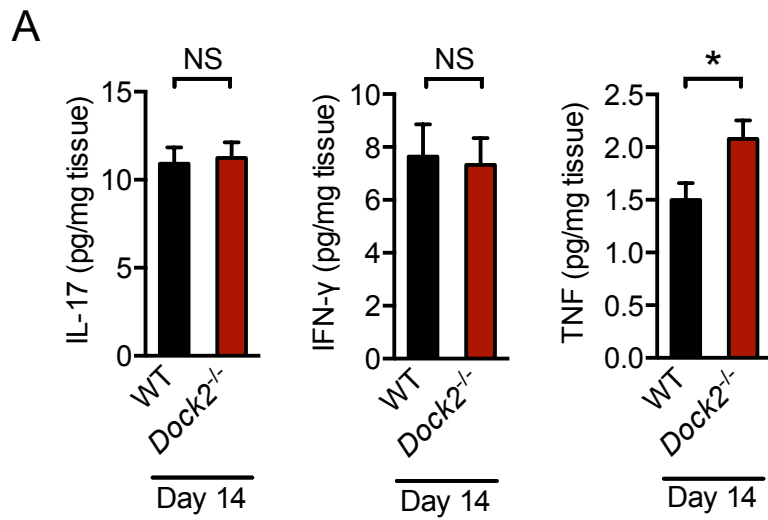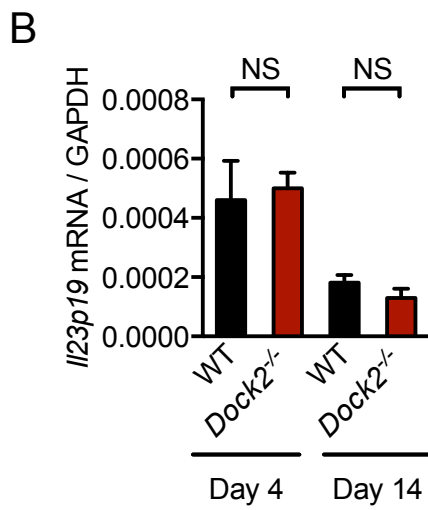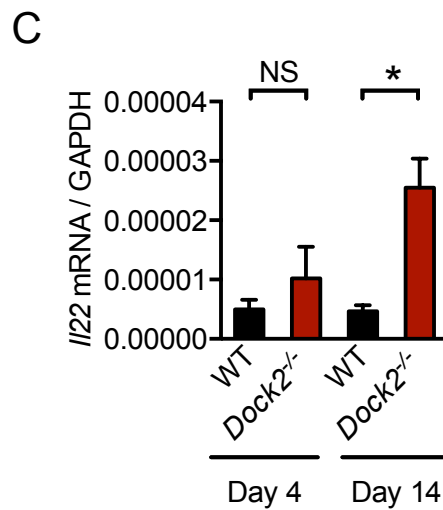

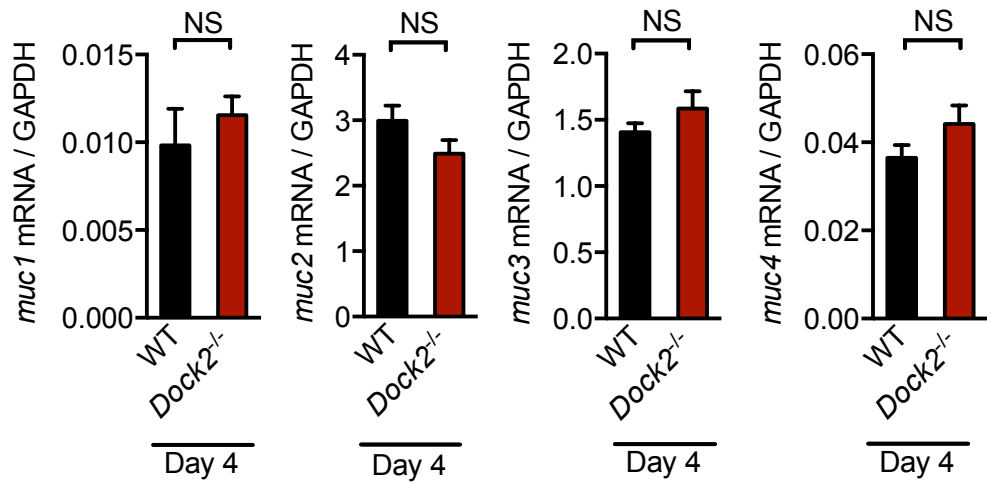

Supplement: srep27814-s1.pdf [file srep27814-s1.pdf]
